# Supplementary material
Source: publisher site journal article supplement (https://www.spandidos-publications.com/1978/downloadSupplementary)

Figure S1. Transfection of NEAT1 and sh-NEAT1. (A) The expression of NEAT was evidently increased in BCPaP and SW579 cells transfected with plasmids carrying lnc-RNA-NEAT1 compared with the cells transfected with the empty vector. (B) The expression of NEAT was downregulated in BCPaP and SW579 cells transfected with sh-NEAT1 compared with the cells transfected with the empty vector. \* $P < 0.05$  vs. p-vector. NEAT1, nuclear enriched abundant transcript 1; lncRNA, long non-coding RNA; p-vector, plasmid-vector; sh, short hairpin RNA.

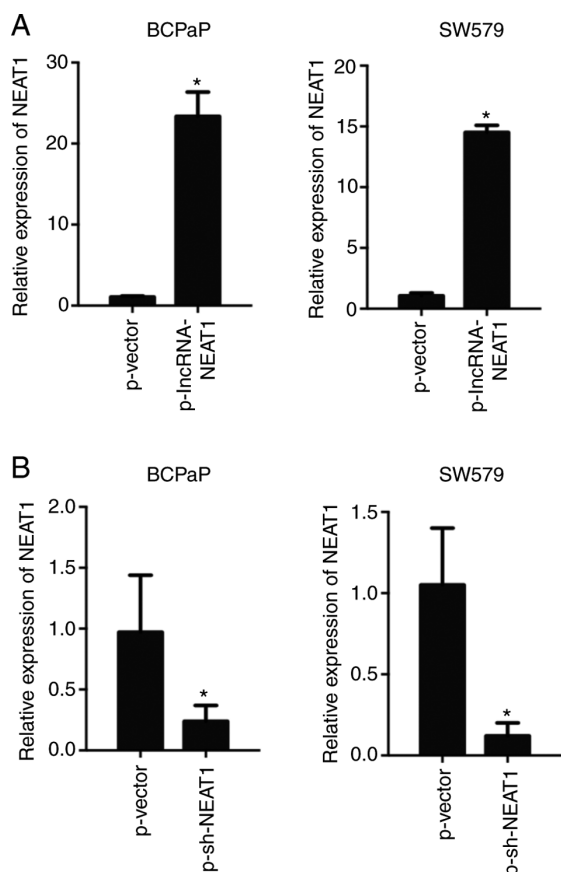

Supplement: Supplementary file 1 [file downloadSupplementary]
